# Supplementary material for: Association of Firearm Ownership, Use, Accessibility, and Storage Practices With Suicide Risk Among US Army Soldiers
Source: PubMed Central journal article supplement (PMC6563574; doi:10.1001/jamanetworkopen.2019.5383), 2019-06-07
Supplement: jamanetwopen-2-e195383-s001.pdf [file jamanetwopen-2-e195383-s001.pdf]

## Supplementary Online Content

Dempsey CL, Benedek DM, Zuromski KL, et al. Association of firearm ownership, use, accessibility, and storage practices with suicide risk among US Army soldiers. *JAMA Netw Open*. 2019;2(6):e195383. doi:10.1001/jamanetworkopen.2019.5383

**eTable.** Comparison of Cases and Controls on Sociodemographic and Army History Variables

This supplementary material has been provided by the authors to give readers additional information about their work.

**eTable. Comparison of Cases and Controls on Sociodemographic and Army History Variables**

| Demographic Variables               | Next of Kin       |      |                                       |      |                                              |      | Supervisor         |                       |                                      |                |                                             |  |
|-------------------------------------|-------------------|------|---------------------------------------|------|----------------------------------------------|------|--------------------|-----------------------|--------------------------------------|----------------|---------------------------------------------|--|
|                                     | Cases<br>(n = 61) |      | Controls<br>(Propensity)<br>(n = 128) |      | Controls<br>(12-month ideation)<br>(n = 108) |      | Cases<br>(n = 107) |                       | Controls<br>(Propensity)<br>(n = 80) |                | Controls<br>(12-month ideation)<br>(n = 73) |  |
|                                     | %                 | %    | OR (CI)                               | %    | OR (CI)                                      | %    | %                  | OR (CI)               | %                                    | OR (CI)        |                                             |  |
| <b>Gender</b>                       |                   |      |                                       |      |                                              |      |                    |                       |                                      |                |                                             |  |
| Female                              | 8.2               | 7.8  | 1.0 (0.4-3.0)                         | 9.0  | 0.9 (0.1-7.8)                                | 12.2 | 9.8                | 1.3 (0.6-2.9)         | 0.3                                  | 1.0 (0.1-8.8)  |                                             |  |
| Male                                | 91.8              | 92.2 | -                                     | 91.0 | -                                            | 87.9 | 90.3               | -                     | 87.7                                 | -              |                                             |  |
| <b>Marital Status</b>               |                   |      |                                       |      |                                              |      |                    |                       |                                      |                |                                             |  |
| Never Married                       | 34.6              | 28.9 | 1.4 (0.8-2.7)                         | 30.2 | 1.3 (0.3-5.0)                                | 34.8 | 32.2               | 1.2 (0.7-2.1)         | 32.2                                 | 1.1 (0.2-5.4)  |                                             |  |
| Previously Married                  | 10.2              | 4.3  | 2.8 (1.0-8.4)                         | 7.3  | 1.6 (0.2-16.6)                               | 9.2  | 5.1                | 2.0 (0.7-5.6)         | 10.6                                 | 0.9 (0.1-9.9)  |                                             |  |
| Currently Married                   | 55.3              | 66.8 | -                                     | 62.5 | -                                            | 56.1 | 62.7               | -                     | 57.2                                 | -              |                                             |  |
| <b>Race/ethnicity</b>               |                   |      |                                       |      |                                              |      |                    |                       |                                      |                |                                             |  |
| White                               | 71.1              | 63.3 | -                                     | 69.1 | -                                            | 65.1 | 60.2               | -                     | 64.3                                 | -              |                                             |  |
| Black                               | 19.3              | 16.3 | 1.1 (0.5-2.2)                         | 13.1 | 1.4 (0.2-8.7)                                | 17.7 | 21.3               | 0.8 (0.4-1.5)         | 12.6                                 | 1.4 (0.2-12.6) |                                             |  |
| Hispanic                            | 5.2               | 16.5 | <b>0.3* (0.1-0.9)</b>                 | 9.5  | 0.5 (0.1-5.1)                                | 8.9  | 14.4               | 0.6 (0.2-1.3)         | 13.8                                 | 0.6 (0.1-5.5)  |                                             |  |
| Asian /Other                        | 4.4               | 3.9  | 1.0 (0.2-4.1)                         | 8.4  | 0.5 (0.0-5.6)                                | 8.4  | 4.2                | 1.9 (0.6-5.5)         | 9.3                                  | 0.9 (0.1-11.2) |                                             |  |
| <b>Rank</b>                         |                   |      |                                       |      |                                              |      |                    |                       |                                      |                |                                             |  |
| E1-E4 vs. E5-E9                     | 48.8              | 61.0 | <b>0.5* (0.3, 1.0)</b>                | 54.7 | 0.6 (0.2, 2.4)                               | 51.2 | 48.9               | 1.0 (0.6, 1.7)        | 54.3                                 | 0.8 (0.2, 3.7) |                                             |  |
| Officer vs. E5-E9                   | 13.3              | 7.4  | 1.3 (0.5, 3.5)                        | 10.9 | 1.0 (0.1, 8.0)                               | 7.2  | 10.6               | 0.7 (0.3, 1.7)        | 12.3                                 | 0.5 (0.0, 5.4) |                                             |  |
| <b>Education</b>                    |                   |      |                                       |      |                                              |      |                    |                       |                                      |                |                                             |  |
| H.S.- Alternate Education- GED      | 19.3              | 10.9 | <b>2.3* (1.0-5.1)</b>                 | 10.9 | 2.2 (0.3-15.0)                               | 20.1 | 17.1               | 1.1 (0.6-2.2)         | 8.7                                  | 2.2 (0.2-28.5) |                                             |  |
| High School diploma                 | 56.3              | 73.0 | -                                     | 69.0 | -                                            | 65.9 | 63.9               | -                     | 63.8                                 | -              |                                             |  |
| Some college                        | 4.4               | 4.6  | 1.2 (0.3-5.0)                         | 1.5  | 3.5 (0.0-393.8)                              | 4.3  | 4.4                | 1.0 (0.3-3.3)         | 3.4                                  | 1.2 (0.0-65.0) |                                             |  |
| College or higher                   | 20.0              | 11.6 | <b>2.2* (1.0-4.9)</b>                 | 18.6 | 1.3 (0.3-6.5)                                | 9.7  | 14.6               | 0.6 (0.3-1.4)         | 24.1                                 | 0.4 (0.1-2.3)  |                                             |  |
| <b>Age At Entry to Army Service</b> |                   |      |                                       |      |                                              |      |                    |                       |                                      |                |                                             |  |
| 17-20                               | 53.3              | 59.7 | -                                     | 55.7 | -                                            | 60.2 | 56.1               | -                     | 52.3                                 | -              |                                             |  |
| 21-24                               | 25.5              | 23.6 | 1.2 (0.6-2.4)                         | 30.2 | 0.9 (0.2-3.6)                                | 29.2 | 26.3               | 1.0 (0.6-1.9)         | 31.0                                 | 0.8 (0.2-4.2)  |                                             |  |
| 25+                                 | 21.3              | 16.7 | 1.4 (0.7-3.0)                         | 14.2 | 1.6 (0.3-9.3)                                | 10.6 | 17.6               | 0.6 (0.3-1.2)         | 16.7                                 | 0.5 (0.1-4.3)  |                                             |  |
| <b>Current age</b>                  |                   |      |                                       |      |                                              |      |                    |                       |                                      |                |                                             |  |
| 18-24                               | 23.5              | 34.6 | 0.5 (0.3-1.2)                         | 35.0 | 0.6 (0.1-2.5)                                | 34.3 | 27.9               | 1.0 (0.5-1.8)         | 36.8                                 | 0.8 (0.1-4.4)  |                                             |  |
| 25-29                               | 38.2              | 30.8 | -                                     | 31.6 | -                                            | 36.8 | 28.4               | -                     | 29.7                                 | -              |                                             |  |
| 30-34                               | 17.7              | 14.9 | 1.0 (0.4-2.2)                         | 12.3 | 1.2 (0.2-8.9)                                | 16.4 | 19.8               | 0.6 (0.3-1.3)         | 11.0                                 | 1.2 (0.1-15.0) |                                             |  |
| <b>35+</b>                          | 20.7              | 19.7 | 0.8 (0.4-1.9)                         | 21.0 | 0.8 (0.1-4.5)                                | 12.5 | 23.9               | <b>0.4* (0.2-0.9)</b> | 22.5                                 | 0.4 (0.1-3.4)  |                                             |  |
| <b>Deployment Status</b>            |                   |      |                                       |      |                                              |      |                    |                       |                                      |                |                                             |  |
| Never Deployed                      | 18.9              | 21.8 | 0.8 (0.4,1.7)                         | 22.7 | 0.8 (0.2,3.5)                                | 28.7 | 16.6               | <b>2.0* (1.1,3.7)</b> | 21.9                                 | 1.4 (0.3,8.1)  |                                             |  |
| Previously Deployed                 | 81.1              | 78.2 | -                                     | 77.3 | -                                            | 71.3 | 83.4               | -                     | 78.1                                 | -              |                                             |  |
| <b>Years of Active Duty</b>         |                   |      |                                       |      |                                              |      |                    |                       |                                      |                |                                             |  |
| 1-4                                 | 24.6              | 42.4 | -                                     | 35.5 | -                                            | 32.6 | 32.7               | -                     | 36.3                                 | -              |                                             |  |
| 5-8                                 | 41.5              | 26.3 | <b>2.7* (1.3, 5.6)</b>                | 31.0 | 1.9 (0.4, 8.8)                               | 39.6 | 32.0               | 1.2 (0.7,2.3)         | 29.9                                 | 1.5 (0.3,8.7)  |                                             |  |
| 9+                                  | 34.0              | 31.3 | 1.9 (0.9, 3.9)                        | 33.6 | 1.5 (0.3, 6.6)                               | 27.8 | 35.2               | 0.8 (0.4,1.5)         | 33.8                                 | 0.9 (0.2,5.1)  |                                             |  |

\*p<0.05 (cases vs controls)

Table abbreviated due to space constraints. Results for excluded variables available upon request.
